# Supplementary material for: Cellular heterogeneity of circulating CD4+CD8+ double-positive T cells characterized by single-cell RNA sequencing
Source: PubMed Central journal article supplement (PMC8655006; doi:10.1038/s41598-021-03013-4), 2021-12-08
Supplement: 41598_2021_3013_MOESM1_ESM.pdf [file 41598_2021_3013_MOESM1_ESM.pdf]

# **Cellular heterogeneity of circulating CD4<sup>+</sup>CD8<sup>+</sup> double-positive T cells characterized by single-cell RNA sequencing**

Sung Min Choi<sup>1</sup>, Hi Jung Park<sup>1</sup>, Eun A Choi<sup>1</sup>,  
Kyeong Cheon Jung<sup>2,3,4</sup>, and Jae Il Lee<sup>2,5,\*</sup>

# Supplementary Figure S1

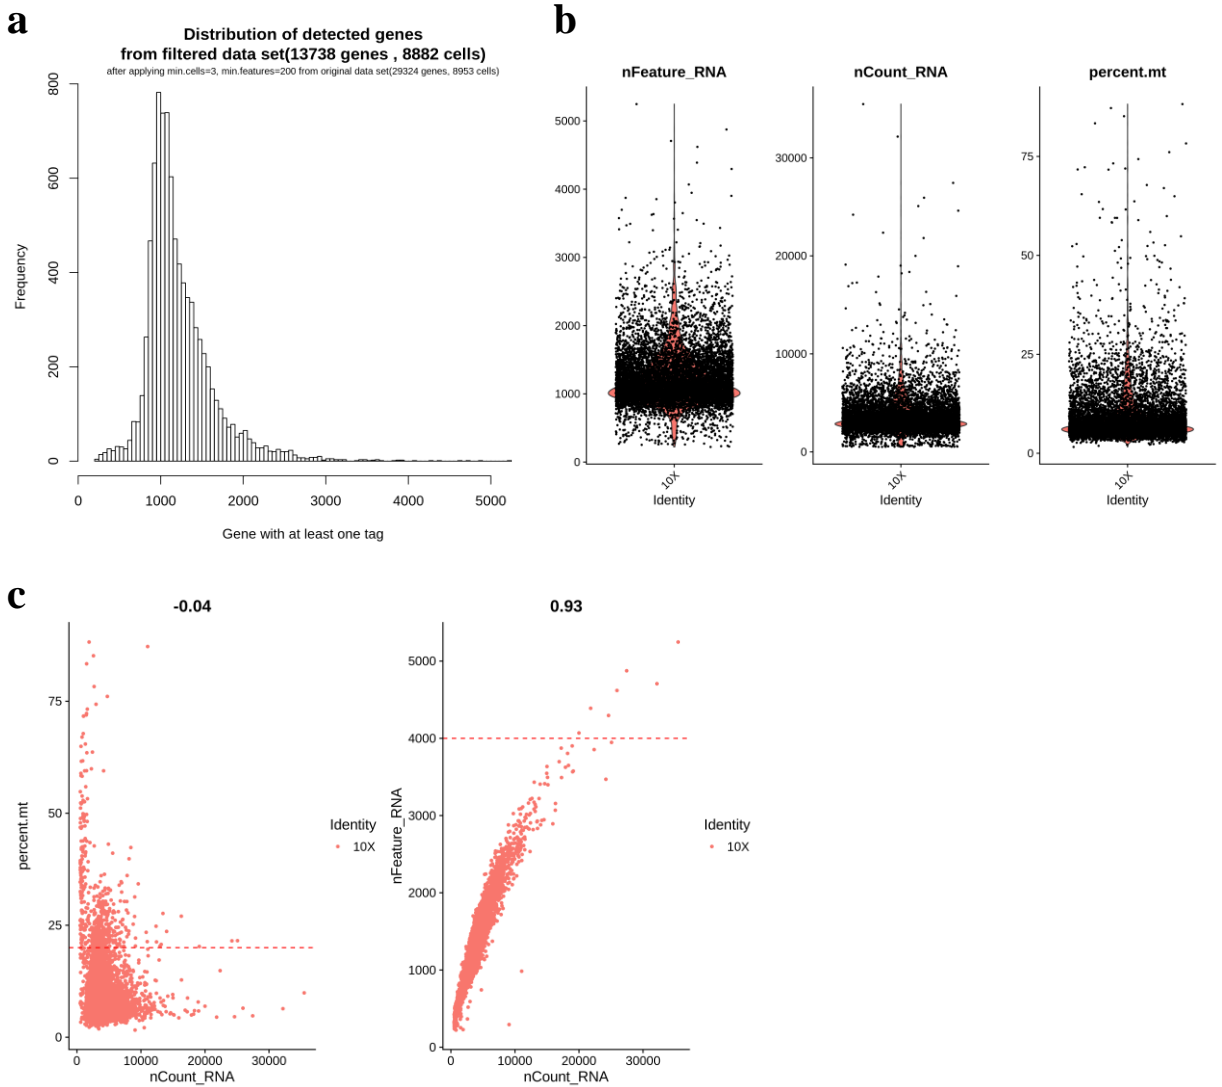

**S1.** Quality control result for scRNA-seq analysis. (a) The histogram showing the frequency of cells containing genes with at least one UMI after filtering out cells/features from original data set. (b) The violin plots representing the distribution of nGene/nUMI/percentage of mitochondrial gene for each cell. (c) The scatter plots representing relationships of mitochondrial percentage-molecule counts and genes-molecule counts for each cell.

## Supplementary Figure S2

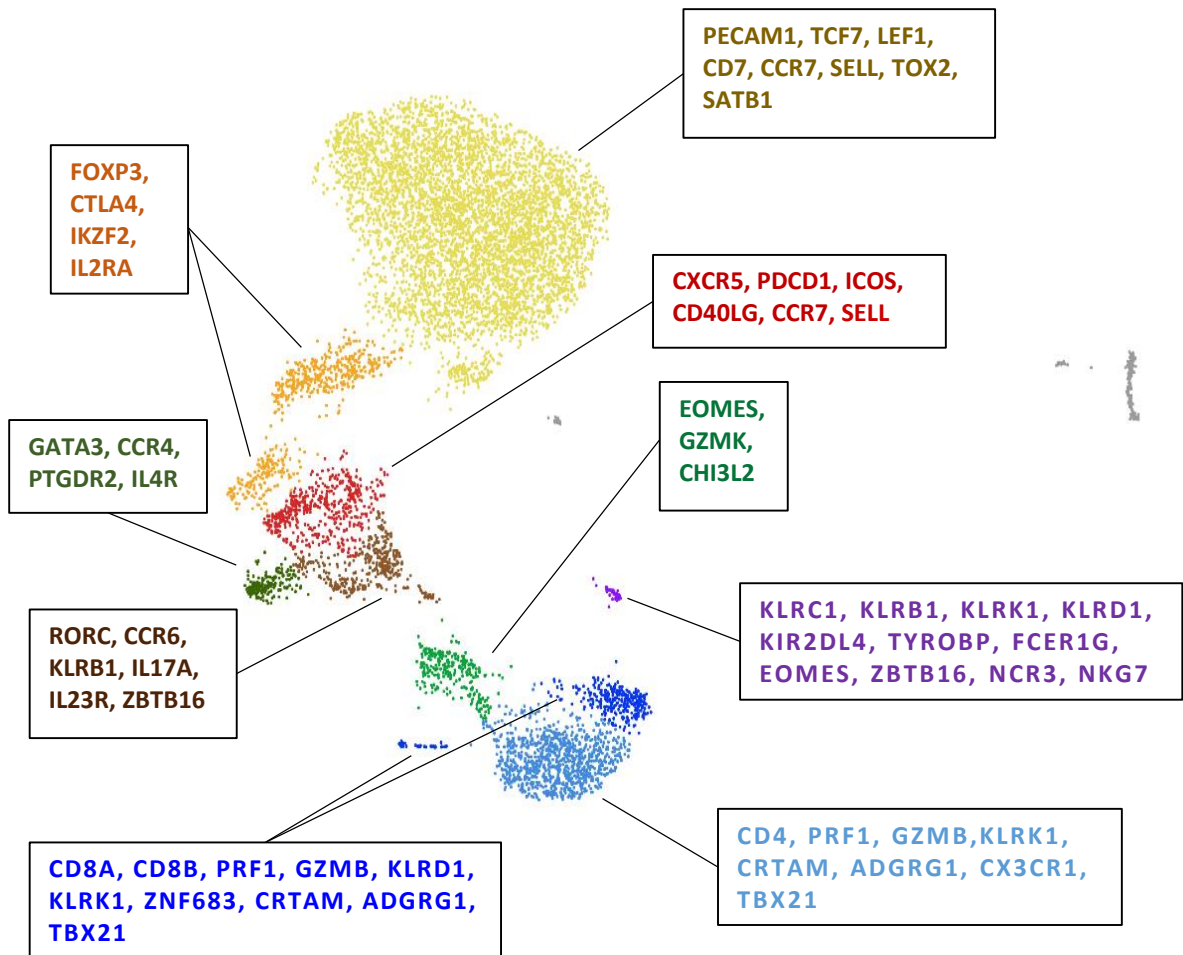

**S2.** Differential expression of genes that define heterogeneous clusters of CD4<sup>+</sup>CD8<sup>+</sup> DP T cells.

## Supplementary Figure S3

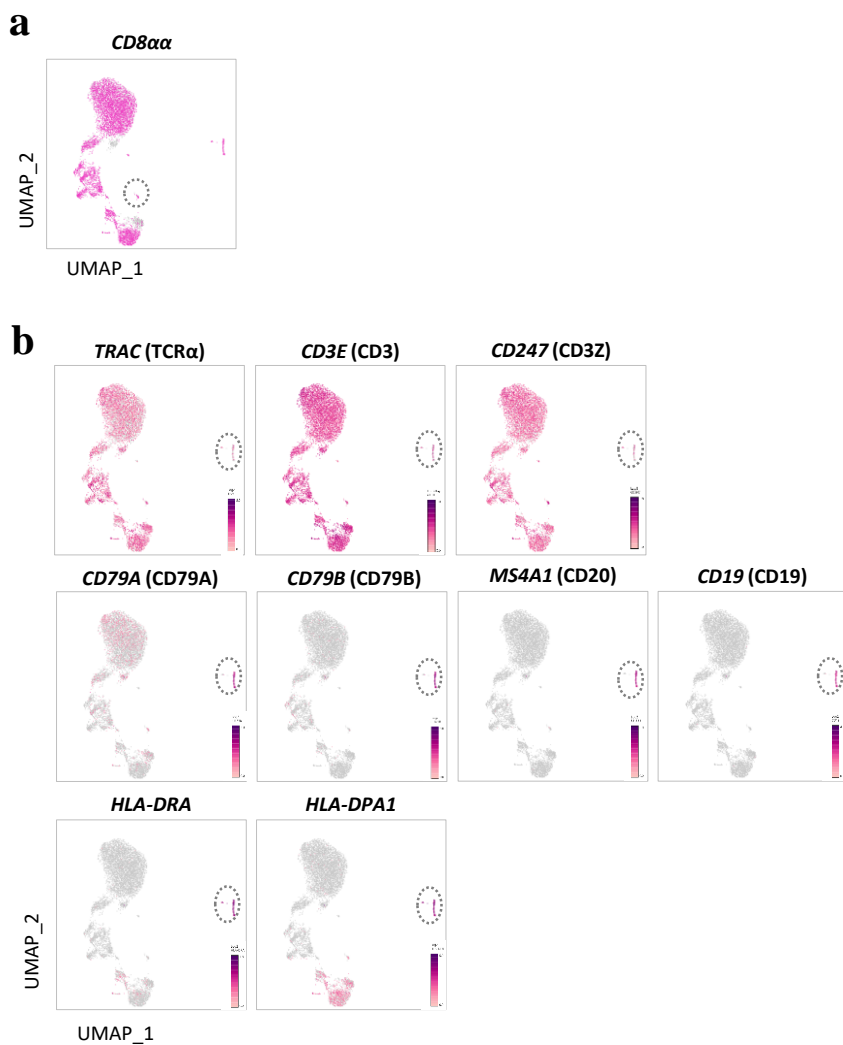

**S3.** (a) UMAP representing *CD8 $\alpha$* . (b) UMAP representing T and B cell-associated genes.
